# Supplementary material for: The prediction of in-hospital mortality in chronic kidney disease patients with coronary artery disease using machine learning models
Source: Springer Nature journal article supplement (doi:10.1186/s40001-023-00995-x), 2023-01-18

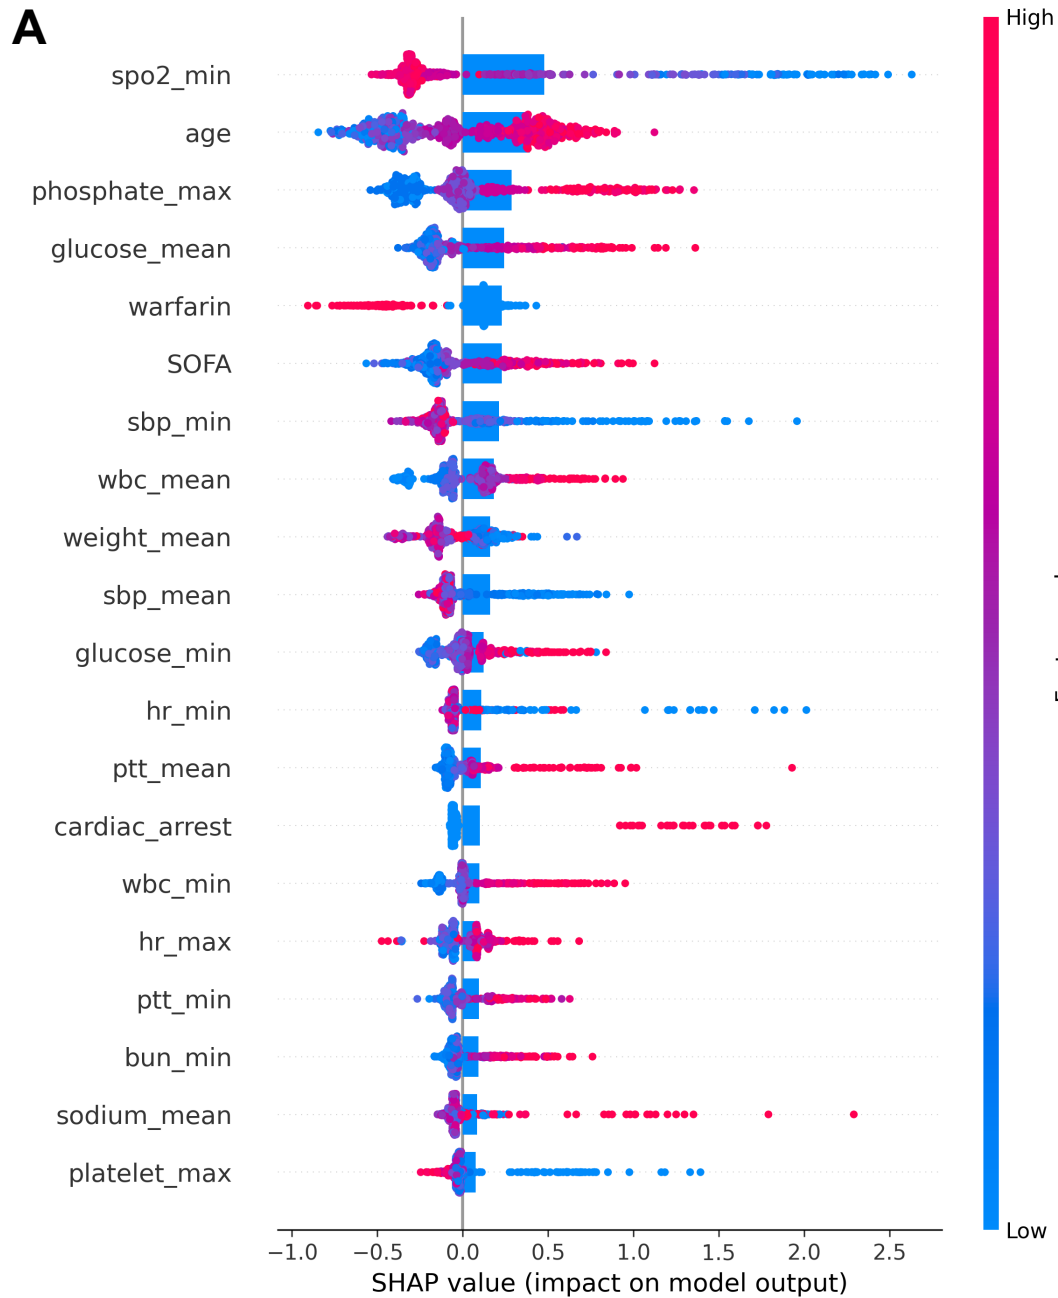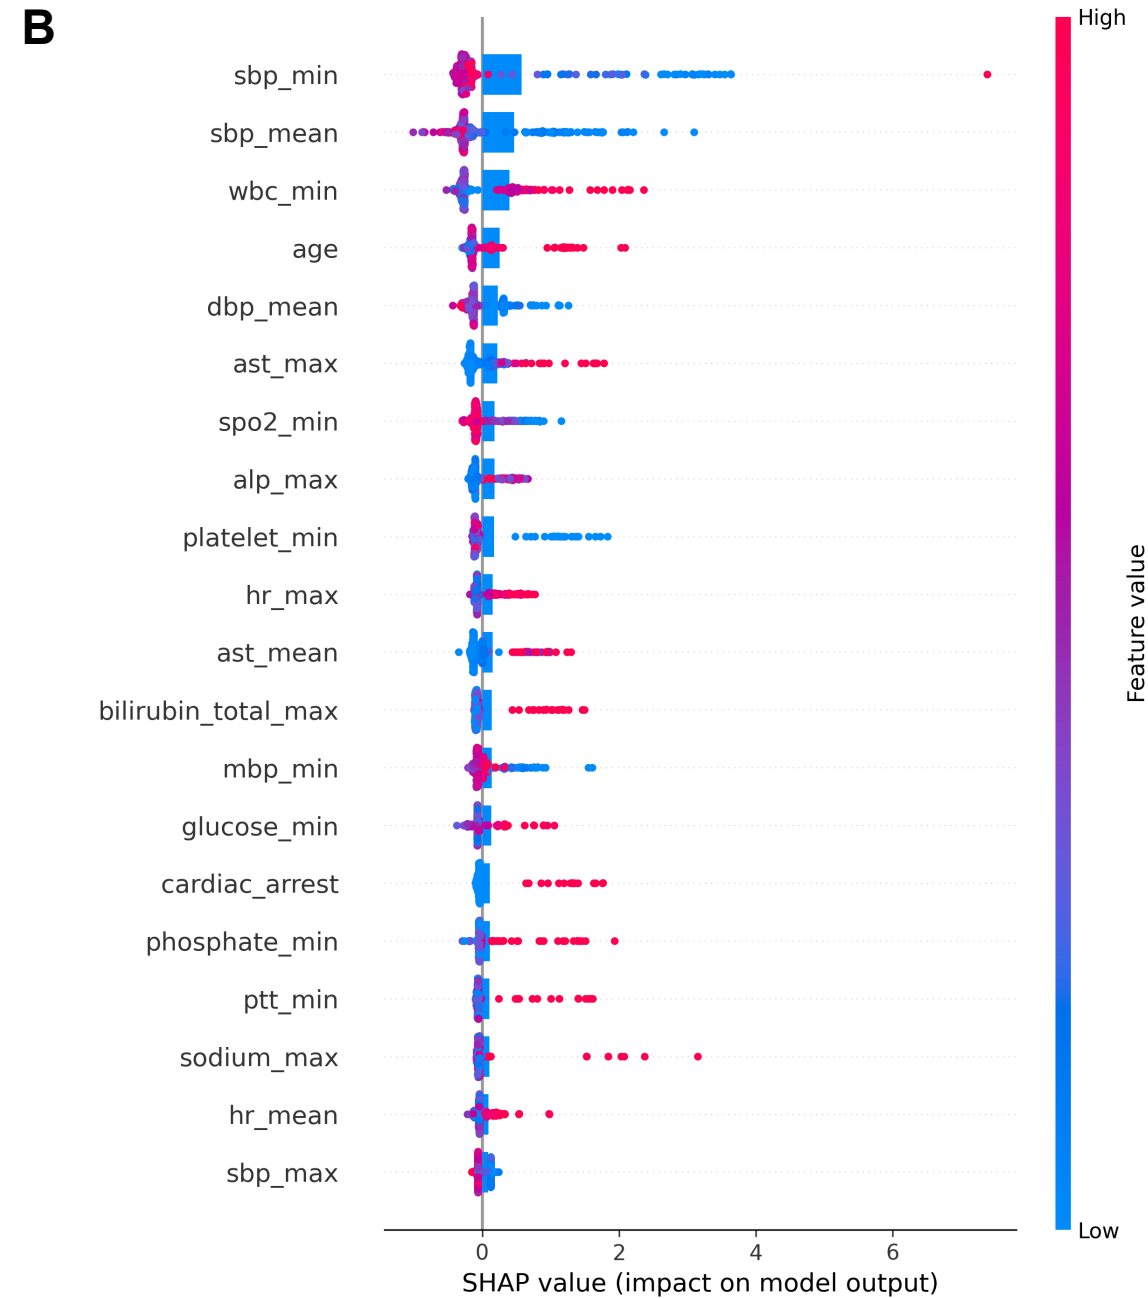

Supplement: MOESM1 [file 23933786]
